# Supplementary material for: Spatio-Temporal Characteristics of Air Quality Index (AQI) over Northwest China
Source: MDPI journal article supplement (doi:10.3390/atmos13030375), 2022-02-23
Supplement: s1 [file s1]

## Spatio-Temporal Characteristics of Air Quality Index (AQI) over Northwest China

Shah Zaib 1, Jianjiang Lu 1,\* and Muhammad Bilal<sup>2</sup>

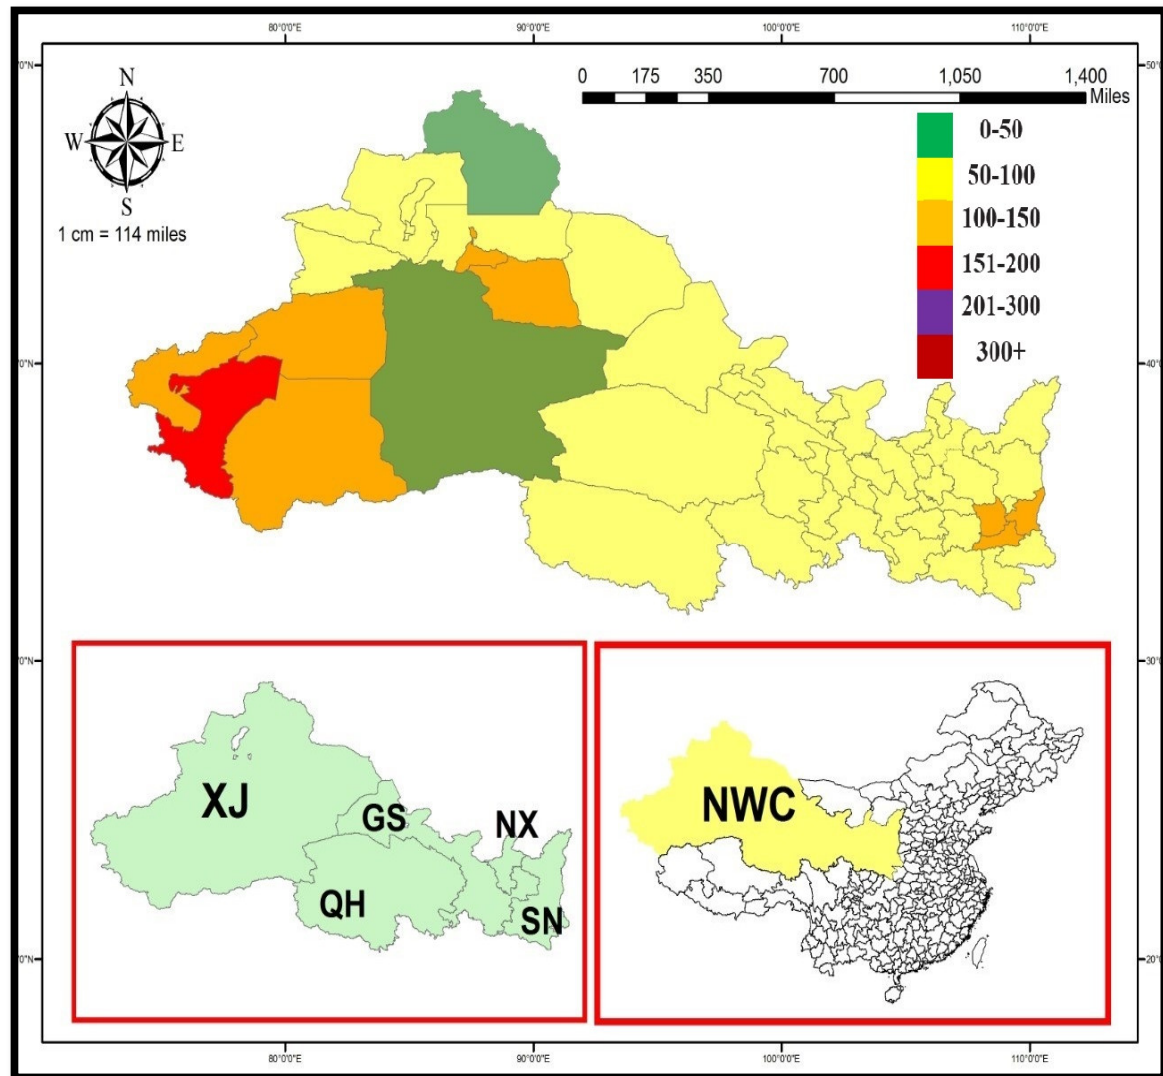

**Figure. S1.** The locations of 53 cities in five provinces (Shaanxi (SN), Xinjiang (XJ), Gansu (GS), Ningxia (NX), and Qinghai (QH)) northwest China (NWC). Color represents the different classes of air quality index e.g., green (0-50, good), yellow (51-100, moderate), orange (101-150, unhealthy for sensitive group), red (151-200, unhealthy for all), purple (201-300, very unhealthy), and maroon (300+, hazardous).

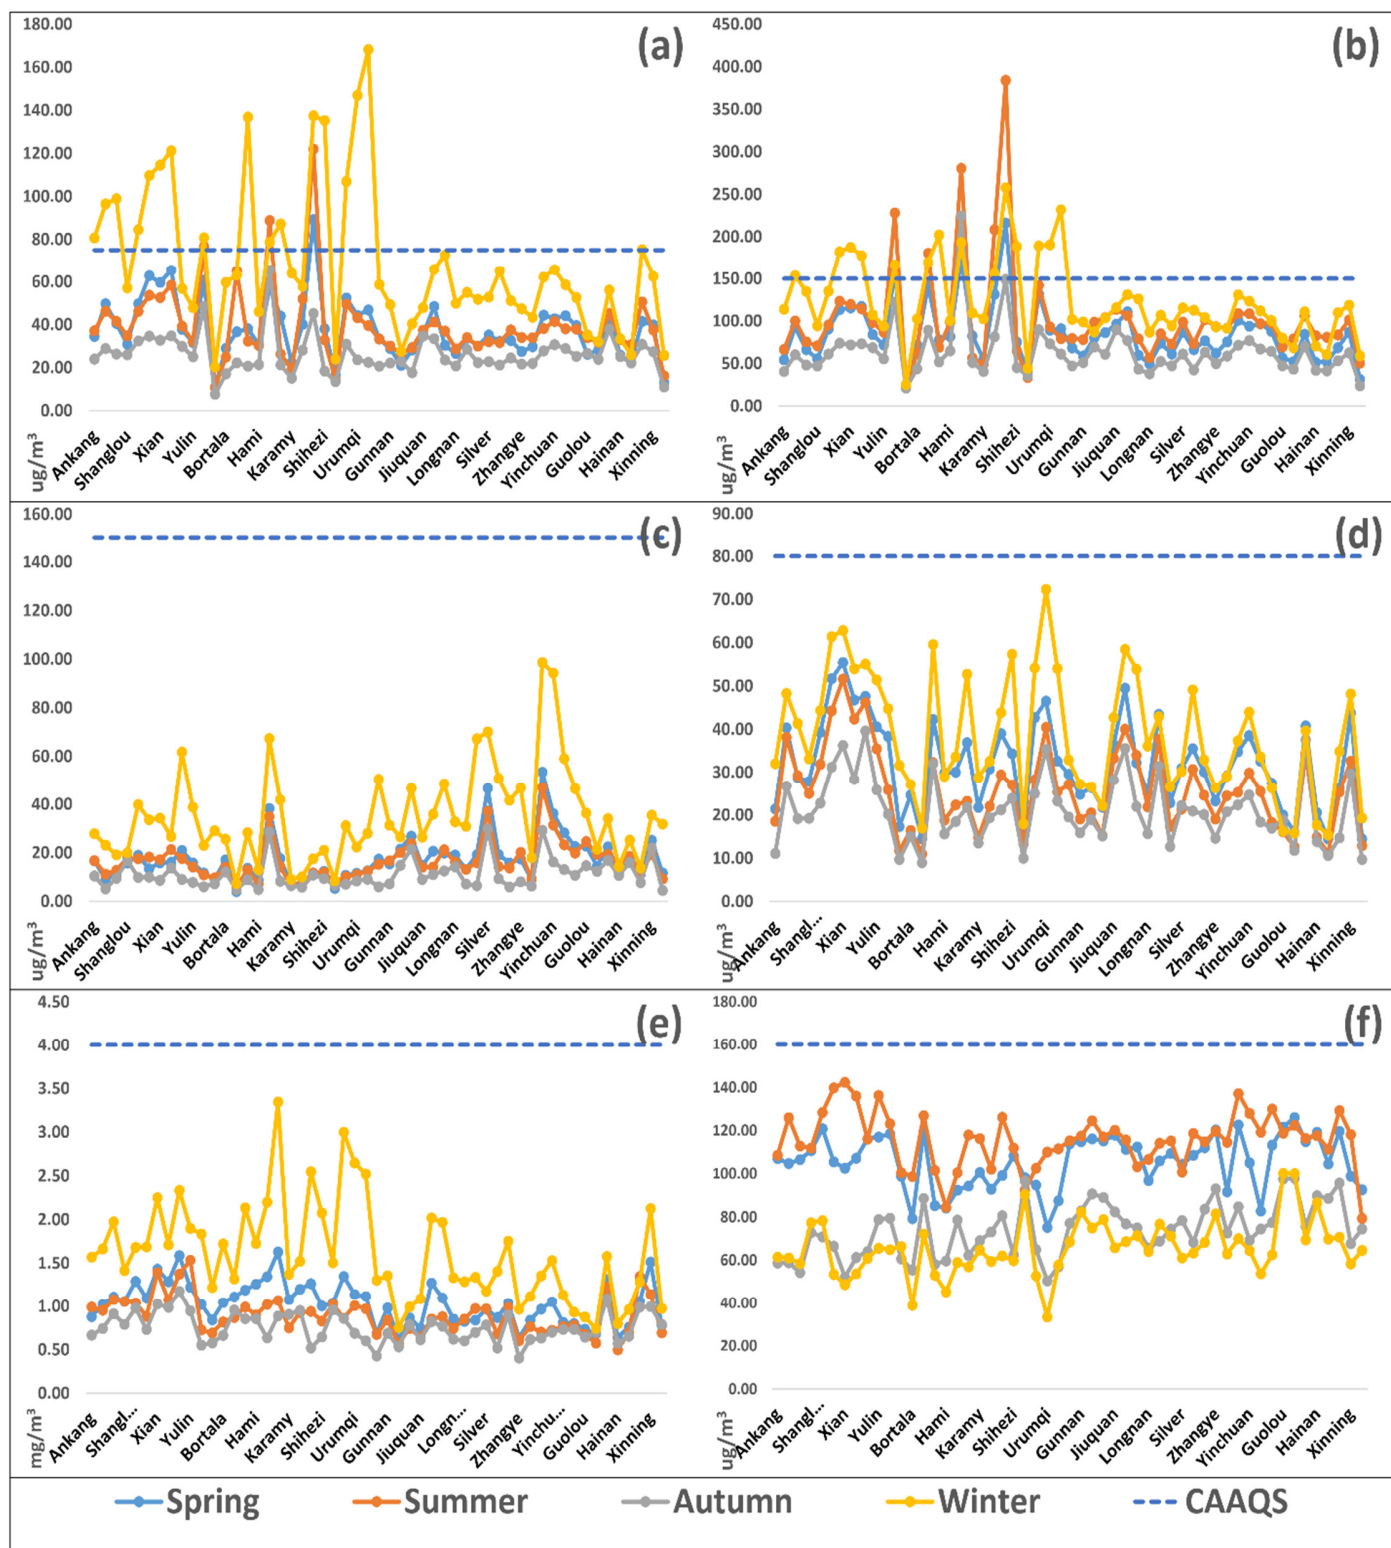

**Figure. S2.** The seasonal (spring, summer, autumn, and winter) spatial distribution of PM<sub>2.5</sub> (a), PM<sub>10</sub> (b), SO<sub>2</sub> (c), NO<sub>2</sub> (d), CO (e), and O<sub>3</sub> (f) in 53 cities of northwest China during 2015-2018. Descriptions are as follow: light blue line with dots (spring), orange line with dots (summer), grey line with dots (autumn), yellow line with dots (winter), and blue line (Chinese ambient air quality standards (CAAQS), daily mean). The abbreviations are as follows: PM<sub>2.5</sub> (fine particulate matter), PM<sub>10</sub> (coarse particulate matter), SO<sub>2</sub> (Sulfur dioxide), NO<sub>2</sub> (nitrogen dioxide), CO (carbon monoxide), and O<sub>3</sub> (ozone).

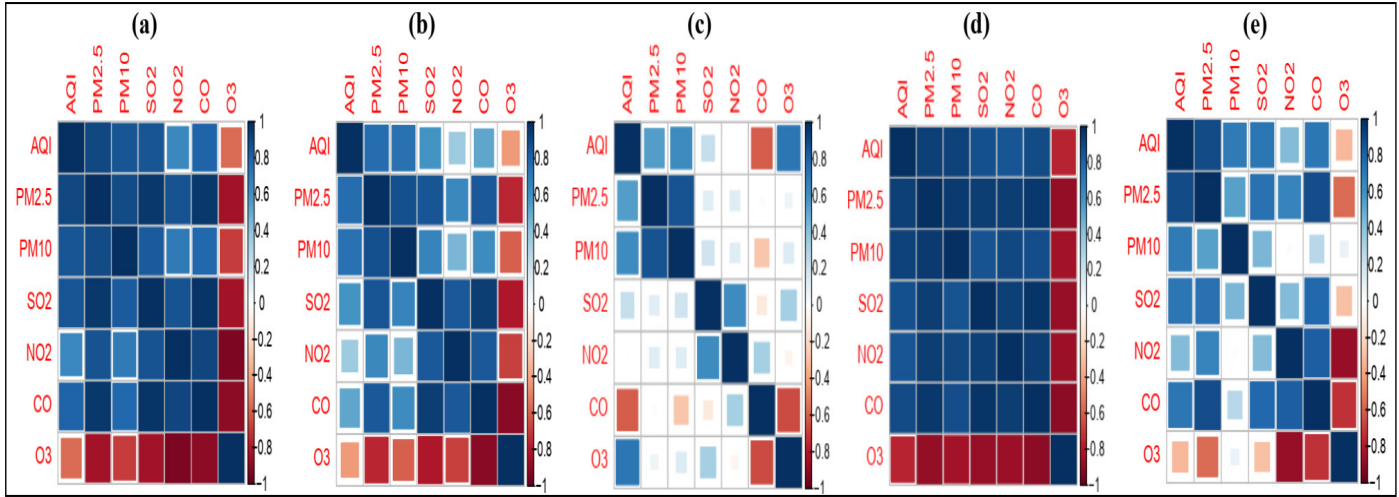

**Figure. S3.** Annual (a) and seasonal (spring (b), summer (c), autumn (d), winter (e)) relationship between air quality index (AQI) and criteria pollutants (PM<sub>2.5</sub>, PM<sub>10</sub>, SO<sub>2</sub>, NO<sub>2</sub>, CO, and O<sub>3</sub>). The abbreviations are as follows: AQI (air quality index), PM<sub>2.5</sub> (fine particulate matter), PM<sub>10</sub> (coarse particulate matter), SO<sub>2</sub> (sulfur dioxide), NO<sub>2</sub> (nitrogen dioxide), CO (carbon monoxide), and O<sub>3</sub> (ozone).

**Table. S1.** Lists of cities, and their ranking in five provinces (Shaanxi (SN), Xinjiang (XJ), Gansu (GS), Ningxia (NX), and Qinghai (QH)) of northwest China (NWC) during 2015-2018.

| <i>Ran<br/>king</i> | <i>City</i> | <i>PM<sub>2.5</sub></i><br>( $\mu\text{g}/\text{m}^3$ ) | <i>City</i> | <i>PM<sub>10</sub></i><br>( $\mu\text{g}/\text{m}^3$ ) | <i>City</i> | <i>SO<sub>2</sub></i><br>( $\mu\text{g}/\text{m}^3$ ) | <i>City</i> | <i>NO<sub>2</sub></i><br>( $\mu\text{g}/\text{m}^3$ ) | <i>City</i> | <i>CO</i><br>( $\text{mg}/\text{m}^3$ ) | <i>City</i> | <i>O<sub>3</sub></i><br>( $\mu\text{g}/\text{m}^3$ ) | <i>City</i> | <i>AQ<br/>I</i> | <i>City</i> |
|---------------------|-------------|---------------------------------------------------------|-------------|--------------------------------------------------------|-------------|-------------------------------------------------------|-------------|-------------------------------------------------------|-------------|-----------------------------------------|-------------|------------------------------------------------------|-------------|-----------------|-------------|
| 1                   | Ankang      | 101.01                                                  | Kashgar     | 255.26                                                 | Kashgar     | 56.88                                                 | Shizuishan  | 51.47                                                 | Xian        | 1.73                                    | Ili         | 114.11                                               | Haibei      | 162.34          | Kashgar     |
| 2                   | Baoji       | 76.39                                                   | Hotan       | 219.63                                                 | Hotan       | 45.82                                                 | Silver      | 48.55                                                 | Urumqi      | 1.61                                    | Yannan      | 111.61                                               | Guolu       | 123.54          | Hotan       |
| 3                   | Hanzhong    | 69.69                                                   | Xianyang    | 167.11                                                 | Aksu        | 44.33                                                 | Yinchuan    | 47.10                                                 | Yannan      | 1.52                                    | Xian        | 109.08                                               | Zhangye     | 112.57          | Aksu        |
| 4                   | Shanglu     | 69.26                                                   | Wujiaqu     | 145.26                                                 | Crete       | 42.39                                                 | Hotan       | 47.08                                                 | Weina       | 1.51                                    | Turpan      | 108.01                                               | Shizuishan  | 111.70          | Xianyang    |
| 5                   | Tonchuan    | 66.76                                                   | Aksu        | 143.12                                                 | Korla       | 30.80                                                 | Wuzhong     | 45.80                                                 | Lanzhou     | 1.44                                    | Xinnin      | 106.85                                               | Hainan      | 111.08          | Wujiaqu     |
| 6                   | Weinan      | 64.99                                                   | Weinan      | 138.34                                                 | Turpan      | 29.62                                                 | Jinchang    | 42.83                                                 | Xianyang    | 1.40                                    | Yulin       | 106.69                                               | Jiayuguan   | 109.98          | Xian        |
| 7                   | Xian        | 64.58                                                   | Xian        | 123.08                                                 | Xian        | 27.21                                                 | Yannan      | 41.47                                                 | Changji     | 1.37                                    | Urumqi      | 106.65                                               | Crete       | 109.64          | Crete       |
| 8                   | Xianyang    | 64.38                                                   | Urumqi      | 122.64                                                 | Weinan      | 27.03                                                 | Qinyang     | 38.85                                                 | Pingliang   | 1.32                                    | Kashgar     | 104.32                                               | Huanggan    | 109.14          | Weinan      |
| 9                   | Yannan      | 60.52                                                   | Turpan      | 120.19                                                 | Xianyang    | 25.43                                                 | Linxia      | 38.48                                                 | Xinnin      | 1.30                                    | Wujiaqu     | 103.94                                               | Yulin       | 105.62          | Urumqi      |
| 10                  | Yulin       | 56.82                                                   | Changji     | 115.37                                                 | Wujiaqu     | 25.41                                                 | Xinnin      | 38.33                                                 | Baoji       | 1.29                                    | Hotan       | 102.44                                               | Jinchang    | 102.48          | Turpan      |
| 11                  | Aksu        | 55.73                                                   | Shihezi     | 111.44                                                 | Urumqi      | 24.80                                                 | Zhongwei    | 38.27                                                 | Yulin       | 1.29                                    | Haidong     | 102.24                                               | Gunna       | 98.00           | Shihezi     |
| 12                  | Altay       | 55.11                                                   | Baoji       | 105.93                                                 | Lanzhou     | 24.58                                                 | Guolu       | 38.15                                                 | Haidong     | 1.29                                    | Changji     | 101.19                                               | Tonchuan    | 97.48           | Korla       |
| 13                  | Bortala     | 52.98                                                   | Tonchuan    | 103.51                                                 | Jiuquan     | 23.30                                                 | Tianshui    | 37.46                                                 | Turpan      | 1.27                                    | Hanzhong    | 100.87                                               | Jiuquan     | 95.66           | Changji     |
| 14                  | Crete       | 51.50                                                   | Hanzhong    | 102.45                                                 | Shizuishan  | 23.04                                                 | Zhangye     | 35.58                                                 | Shihezi     | 1.26                                    | Xianyang    | 99.77                                                |             | 93.93           |             |
| 15                  | Changji     | 49.44                                                   | Huanggan    | 101.28                                                 | Baoji       | 22.76                                                 | Haidong     | 35.44                                                 |             |                                         | Tonchuan    | 99.58                                                | Aksu        | 92.13           | Baoji       |
| 16                  | Hami        | 47.12                                                   | Lanzhou     | 100.18                                                 | Yinchuan    | 22.10                                                 |             | 35.14                                                 | Linxia      | 1.25                                    | Lanzhou     | 98.81                                                | Haixi       | 88.18           | Shizuishan  |
| 17                  | Hotan       | 46.97                                                   | Crete       | 100.06                                                 | Changji     | 21.48                                                 | Tonchuan    | 34.51                                                 | Tonchuan    | 1.18                                    | Hami        | 98.66                                                | Haidong     | 85.38           | Yinchuan    |
| 18                  | Ili         | 45.20                                                   | Haidong     | 95.20                                                  | Tonchuan    | 20.71                                                 | Jiayuguan   | 34.21                                                 | Yinchuan    | 1.17                                    | Linxia      | 98.12                                                | Linxia      | 84.66           | Lanzhou     |
| 19                  | Karamay     | 44.95                                                   | Yinchuan    | 92.89                                                  | Shihezi     | 20.54                                                 | Longnan     | 33.98                                                 | Tianshui    | 1.17                                    | Huanggan    | 97.87                                                | Zhongwei    | 83.90           | Huanggan    |
| 20                  | Korla       | 44.55                                                   | Ili         | 92.72                                                  | Wuzhong     | 20.46                                                 |             | 33.77                                                 | Wujiaqu     | 1.17                                    | Wuwei       | 96.87                                                | Qinyang     | 83.56           | Jiuquan     |
| 21                  | Kashgar     | 44.23                                                   | Korla       | 91.66                                                  | Haidong     | 20.32                                                 | Lanzhou     | 33.58                                                 | Ili         | 1.15                                    | Korla       | 96.87                                                |             | 83.33           | Hanzhong    |
| 22                  | Shihezi     | 43.84                                                   | Ankang      | 91.24                                                  | Xinnin      | 19.43                                                 | Xianyang    | 33.40                                                 | Kashgar     | 1.13                                    | Shihezi     | 96.10                                                | Lanzhou     | 80.79           | Wuzhong     |
| 23                  | Tachen      | 42.88                                                   | Shizuishan  | 90.08                                                  | Silver      | 19.23                                                 |             | 32.15                                                 | Aksu        | 1.13                                    | Tachen      | 96.02                                                | Weinan      | 79.81           | Haidong     |
| 24                  | Turpan      | 42.29                                                   | Wuzhong     | 89.25                                                  | Yannan      | 19.06                                                 | Haixi       | 29.90                                                 | Shizuishan  | 1.10                                    | Weinan      | 95.73                                                | Shanglu     | 79.46           | Zhongwei    |
| 25                  | Urumqi      | 41.27                                                   | Xinnin      | 88.21                                                  | Jinchang    | 19.05                                                 |             | 29.58                                                 | Hanzhong    | 1.09                                    | Baoji       | 95.63                                                | Dingxi      | 79.41           | Yannan      |
| 26                  | Wujiaqu     | 40.82                                                   | Yannan      | 87.08                                                  | Zhongwei    | 18.94                                                 | Xian        | 27.49                                                 | Wuzhong     | 1.08                                    | Shanglu     | 94.81                                                | Tachen      | 79.30           | Ili         |

|    |         |      |         |      |         |      |         |      |         |      |         |      |         |     |         |
|----|---------|------|---------|------|---------|------|---------|------|---------|------|---------|------|---------|-----|---------|
| 27 | Dingxi  | 40.4 | Linxia  | 86.2 | Hami    | 18.7 | Weina   | 27.2 | Dingxi  | 1.06 | Crete   | 94.2 | XianYa  | 79. |         |
| 28 | Gunna   | 38.7 | Jiuqua  | 86.1 | Wuwei   | 17.9 | Ankan   | 26.9 | Wuwei   | 1.06 | Bortala | 93.0 | Tiansh  | 78. | Silver  |
| 29 | Jiayug  | 38.6 | Zhong   | 83.6 | Jiayug  | 17.6 | Gunna   | 26.2 | Shangl  | 1.03 | Aksu    | 91.9 | Kashg   | 77. | Xinnin  |
| 30 | Jincha  | 37.7 | Pinglia | 80.8 | Hanzh   | 17.5 | Shangl  | 26.1 |         |      | Karam   | 91.8 |         | 75. | Jincha  |
| 31 | Jiuqua  | 36.9 | Shangl  | 79.1 | Pinglia | 17.2 |         | 26.1 |         |      | Ankan   | 91.6 | Yanna   | 75. | Jiayug  |
| 32 | Lanzh   | 36.8 | Tiansh  | 78.9 | Guyua   | 16.9 |         | 26.1 |         |      | Yinchu  | 90.9 | Pinglia | 74. |         |
| 33 |         | 36.4 |         | 78.7 | Huang   | 16.0 | Pinglia | 25.8 | Guyua   |      |         | 90.8 | Turpa   | 74. |         |
| 34 | Longn   | 36.2 |         | 76.6 |         | 16.0 | Jiuqua  | 25.2 | Huang   | 0.96 | Gunna   | 90.3 | Karam   | 74. | Zhang   |
| 35 | Pinglia | 35.5 | Dingxi  | 76.3 | Yulin   | 15.9 | Changj  | 24.6 | Longn   | 0.96 | Qinya   | 88.9 |         | 73. | Pinglia |
| 36 | Qinya   | 34.0 | Silver  | 74.8 | Linxia  | 15.4 | Wujiaq  | 23.3 |         |      | Shizuis | 88.6 | Xian    | 73. | Ankan   |
| 37 |         | 33.2 | Yulin   | 74.1 | Ili     | 14.6 | u       | 0    | Hami    | 0.91 | han     | 7    | Silver  | 52. |         |
| 38 | Silver  | 32.6 | Qinya   | 73.7 | Zhang   | 14.3 | Turpa   | 23.1 | Jiayug  | 0.89 | Pinglia | 88.3 |         | 72. | Hami    |
| 39 | Tiansh  | 32.5 | ng      | 72.3 | ye      | 13.6 | n       | 1    | uan     | 0.88 | Longn   | 87.9 | Guyua   | 72. | Tiansh  |
| 40 | Wuwei   | 32.5 | Bortala | 71.5 | Dingxi  | 13.6 | Yushu   | 2    | wei     | 0.87 | an      | 0    | n       | 25  | ui      |
| 41 | Zhang   | 32.1 | Zhang   | 72.3 | Tiansh  | 13.6 |         | 21.6 | Gunna   |      | Tiansh  | 87.8 | Xinnin  | 70. |         |
| 42 | Ye      | 32.0 | ye      | 71.5 | ui      | 7    | Altay   | 9    | n       | 0.87 | ui      | 0    | g       | 76  | Dingxi  |
| 43 | Guyua   | 32.1 | Gunna   | 69.9 | Gunna   | 13.6 |         | 20.7 | Zhang   |      | Wuzho   | 87.2 |         | 70. | Guyua   |
| 44 |         | 32.1 | n       | 69.9 | n       | 5    | Shihezi | 8    | ye      | 0.86 | ng      | 7    | Hotan   | 32  | n       |
| 45 | Shizuis | 32.0 | Hami    | 68.5 | Bortala | 13.1 | Urumq   | 20.7 |         |      | Jincha  | 85.8 | Hanzh   | 70. |         |
| 46 | Han     | 32.0 | Guyua   | 68.5 | Ankan   | 13.1 | i       | 8    | Bortala | 0.85 | ng      | 2    | ong     | 32  | Haibei  |
| 47 | Yinchu  | 31.3 | Guo     | 68.3 | Ankan   | 13.1 | Haina   | 20.7 | Ankan   | 0.83 | Guyua   | 85.6 | Ankan   | 70. | Gunna   |
| 48 | Wuzho   | 30.4 | n       | 66.5 | g       | 5    | n       | 1    | g       |      | n       | 7    | g       | 19  | n       |
| 49 | Zhong   | 30.1 | Longn   | 68.3 | Qinya   | 13.0 | Hanzh   | 19.8 | Qinya   | 0.83 | Altay   | 85.3 | Ili     | 70. | Shangl  |
| 50 | Wei     | 30.4 | an      | 66.5 | ng      | 9    | ong     | 2    | ng      |      | Zhong   | 83.9 |         | 69. | Qinya   |
| 51 | Guolo   | 29.3 | Guolo   | 63.2 | Shangl  | 12.9 | Kashg   | 19.6 | Karam   | 0.81 | wei     | 9    | Korla   | 52  | ng      |
| 52 |         | 30.1 | Karam   | 63.2 | ou      | 0    |         | 7    | y       |      |         | 83.8 |         | 69. | Guolo   |
| 53 | Guolo   | 29.3 | y       | 61.7 | Guolo   | 12.8 | Aksu    | 18.5 | Jincha  | 0.80 | Yushu   | 8    | Altay   | 10  | u       |
| 54 |         | 29.3 | Haina   | 61.7 | Karam   | 12.1 |         | 17.7 | Guolo   | 0.77 | Jiuqua  | 82.0 | Wuzho   | 66. | Haina   |
| 55 | Haibei  | 28.9 | n       | 61.6 | y       | 0    | Baoji   | 8    | u       |      | n       | 2    | ng      | 02  | n       |
| 56 | Haido   | 28.7 | Haina   | 11.2 | Haina   | 11.2 | Huang   | 17.5 |         |      |         | 79.9 |         | 65. | Karam   |
| 57 | ng      | 28.7 | Haibei  | 10.6 | n       | 2    | gnan    | 9    | Altay   | 0.77 | Haixi   | 4    | Yushu   | 93  | y       |
| 58 | Haina   | 25.2 | Jincha  | 60.5 | Haibei  | 7    | Guyua   | 16.7 | Haina   | 0.77 | Dingxi  | 77.3 | Longn   | 65. | Bortala |
| 59 | n       | 25.2 | ng      | 58.5 |         |      |         | 5    | n       |      | Guolo   | 77.1 | an      | 56  |         |
| 60 |         | 24.4 | Haixi   | 57.6 | Haixi   | 8.45 | Hami    | 4    | Tachen  | 0.73 | u       | 0    | Changj  | 62. | Haixi   |
| 61 | Haixi   | 24.4 | Jiayug  | 57.6 | Longn   | 7.60 |         | 14.1 | g       |      |         | 76.7 | i       | 61. | Longn   |
| 62 | Huang   | 17.0 | uan     | 40.9 | an      |      | Korla   | 8    | Yushu   | 0.67 | Haibei  | 2    | Hami    | 12  | an      |
| 63 | gnan    | 17.0 | Tachen  | 40.9 | Yushu   | 7.32 | Karam   | 14.0 |         | 0.65 | Zhang   | 76.3 | Wujiaq  | 52. | Tachen  |
| 64 | Xinnin  | 16.5 | g       | 38.3 | Tachen  | 7.12 | y       | 6    | Haibei  |      | ye      | 4    | u       | 51  | g       |
| 65 |         | 12.3 | Yushu   | 22.6 | g       |      | Tachen  | 12.8 |         | 0.63 | Haina   | 74.6 |         | 51. |         |
| 66 | Yushu   | 7    | Altay   | 7    | Altay   | 5.47 | g       | 7    | Haixi   |      | n       | 1    | Bortala | 69  | Yushu   |
| 67 |         | 12.3 |         |      |         |      |         | 12.8 |         |      | Jiayug  | 67.5 | Urumq   | 47. |         |
| 68 |         | 7    |         |      |         |      | Crete   | 7    | Crete   | 0.62 | uan     | 0    | i       | 42  | Altay   |

**Table. S2.** Pearson Correlation between AQI and six criteria pollutants (PM<sub>2.5</sub>, PM<sub>10</sub>, SO<sub>2</sub>, NO<sub>2</sub>, CO, and O<sub>3</sub>) in northwest China (NWC) during 2015-2018. The abbreviations are as follows: AQI (air quality index), PM<sub>2.5</sub> (fine particulate matter), PM<sub>10</sub> (coarse particulate matter), SO<sub>2</sub> (sulfur dioxide), NO<sub>2</sub> (nitrogen dioxide), CO (carbon monoxide), and O<sub>3</sub> (ozone).

|                   | PM <sub>2.5</sub> | PM <sub>10</sub> | SO <sub>2</sub>  | NO <sub>2</sub>  | CO               | O <sub>3</sub>    |
|-------------------|-------------------|------------------|------------------|------------------|------------------|-------------------|
| <b>Annual</b>     | R/sig./n          | R/sig./n         | R/sig./n         | R/sig./n         | R/sig./n         | R/sig./n          |
| AQI               | .901**/0.000/365  | .855**/0.000/365 | .852**/0.000/365 | .644**/0.000/365 | .805**/0.000/365 | -.568**/0.000/365 |
| PM <sub>2.5</sub> |                   | .897**/0.000/365 | .965**/0.000/365 | .864**/0.000/365 | .961**/0.000/365 | -.831**/0.000/365 |
| PM <sub>10</sub>  |                   |                  | .833**/0.000/365 | .710**/0.000/365 | .788**/0.000/365 | -.697**/0.000/365 |
| SO <sub>2</sub>   |                   |                  |                  | .868**/0.000/365 | .975**/0.000/365 | -.836**/0.000/365 |
| NO <sub>2</sub>   |                   |                  |                  |                  | .920**/0.000/365 | -.930**/0.000/365 |
| CO                |                   |                  |                  |                  |                  | -.899**/0.000/365 |
| <b>Spring</b>     |                   |                  |                  |                  |                  |                   |
| AQI               | .770**/0.000/92   | .748**/0.000/92  | .598**/0.000/92  | .357**/0.000/92  | .530**/0.000/92  | -.423**/0.000/92  |
| PM <sub>2.5</sub> |                   | .874**/0.000/92  | .854**/0.000/92  | .643**/0.000/92  | .843**/0.000/92  | -.753**/0.000/92  |
| PM <sub>10</sub>  |                   |                  | .670**/0.000/92  | .458**/0.000/92  | .629**/0.000/92  | -.596**/0.000/92  |
| SO <sub>2</sub>   |                   |                  |                  | .846**/0.000/92  | .946**/0.000/92  | -.804**/0.000/92  |
| NO <sub>2</sub>   |                   |                  |                  |                  | .842**/0.000/92  | -.688**/0.000/92  |
| CO                |                   |                  |                  |                  |                  | -.900**/0.000/92  |
| <b>Summer</b>     |                   |                  |                  |                  |                  |                   |
| AQI               | .551**/0.000/92   | .626**/0.000/92  | .231*/0.027/92   | -.010/0.926/92   | -.603**/0.000/92 | .724**/0.000/92   |
| PM <sub>2.5</sub> |                   | .868**/0.000/92  | .129/0.220/92    | .138/0.189/92    | -.020/0.853/92   | .071/0.500/92     |
| PM <sub>10</sub>  |                   |                  | .206*/0.049/92   | .135/0.199/92    | -.280**/0.007/92 | .143/0.173/92     |
| SO <sub>2</sub>   |                   |                  |                  | .628**/0.000/92  | -.118/0.261/92   | .331**/0.001/92   |
| NO <sub>2</sub>   |                   |                  |                  |                  | .333**/0.001/92  | -.060/0.572/92    |
| CO                |                   |                  |                  |                  |                  | -.659**/0.000/92  |
| <b>Autumn</b>     |                   |                  |                  |                  |                  |                   |
| AQI               | .934**/0.000/91   | .924**/0.000/91  | .879**/0.000/91  | .859**/0.000/91  | .899**/0.000/91  | -.765**/0.000/91  |
| PM <sub>2.5</sub> |                   | .951**/0.000/91  | .948**/0.000/91  | .947**/0.000/91  | .969**/0.000/91  | -.879**/0.000/91  |
| PM <sub>10</sub>  |                   |                  | .869**/0.000/91  | .901**/0.000/91  | .889**/0.000/91  | -.835**/0.000/91  |
| SO <sub>2</sub>   |                   |                  |                  | .934**/0.000/91  | .976**/0.000/91  | -.868**/0.000/91  |
| NO <sub>2</sub>   |                   |                  |                  |                  | .946**/0.000/91  | -.853**/0.000/91  |
| CO                |                   |                  |                  |                  |                  | -.895**/0.000/91  |
| <b>Winter</b>     |                   |                  |                  |                  |                  |                   |
| AQI               | .894**/0.000/90   | .701**/0.000/90  | .729**/0.000/90  | .430**/0.000/90  | .727**/0.000/90  | -.325**/0.002/90  |
| PM <sub>2.5</sub> |                   | .550**/0.000/90  | .745**/0.000/90  | .663**/0.000/90  | .881**/0.000/90  | -.567**/0.000/90  |
| PM <sub>10</sub>  |                   |                  | .450**/0.000/90  | -.018/0.870/90   | .272**/0.009/90  | .088/0.410/90     |
| SO <sub>2</sub>   |                   |                  |                  | .439**/0.000/90  | .781**/0.000/90  | -.299**/0.004/90  |
| NO <sub>2</sub>   |                   |                  |                  |                  | .826**/0.000/90  | -.864**/0.000/90  |
| CO                |                   |                  |                  |                  |                  | -.724**/0.000/90  |

Note: The correlations are expressed as Pearson's correlation coefficient, where \*, and \*\* denote significant correlations at p b 0.01, and p b 0.05 (two-tailed) respectively.
